# Supplementary material for: Specialized Metabolites from Ribosome Engineered Strains of Streptomyces clavuligerus
Source: PubMed Central journal article supplement (PMC8069389; doi:10.3390/metabo11040239), 2021-04-13
Supplement: metabolites-11-00239-s001.pdf [file metabolites-11-00239-s001.pdf]

**Figure S1:** Comparison plots showing mass spectrometry fragmentation patterns of putative metabolites (1-8) from the first triterpenoid molecular network. Peaks shared between predicted and experimental spectra are indicated in green and those not matched are in blue.

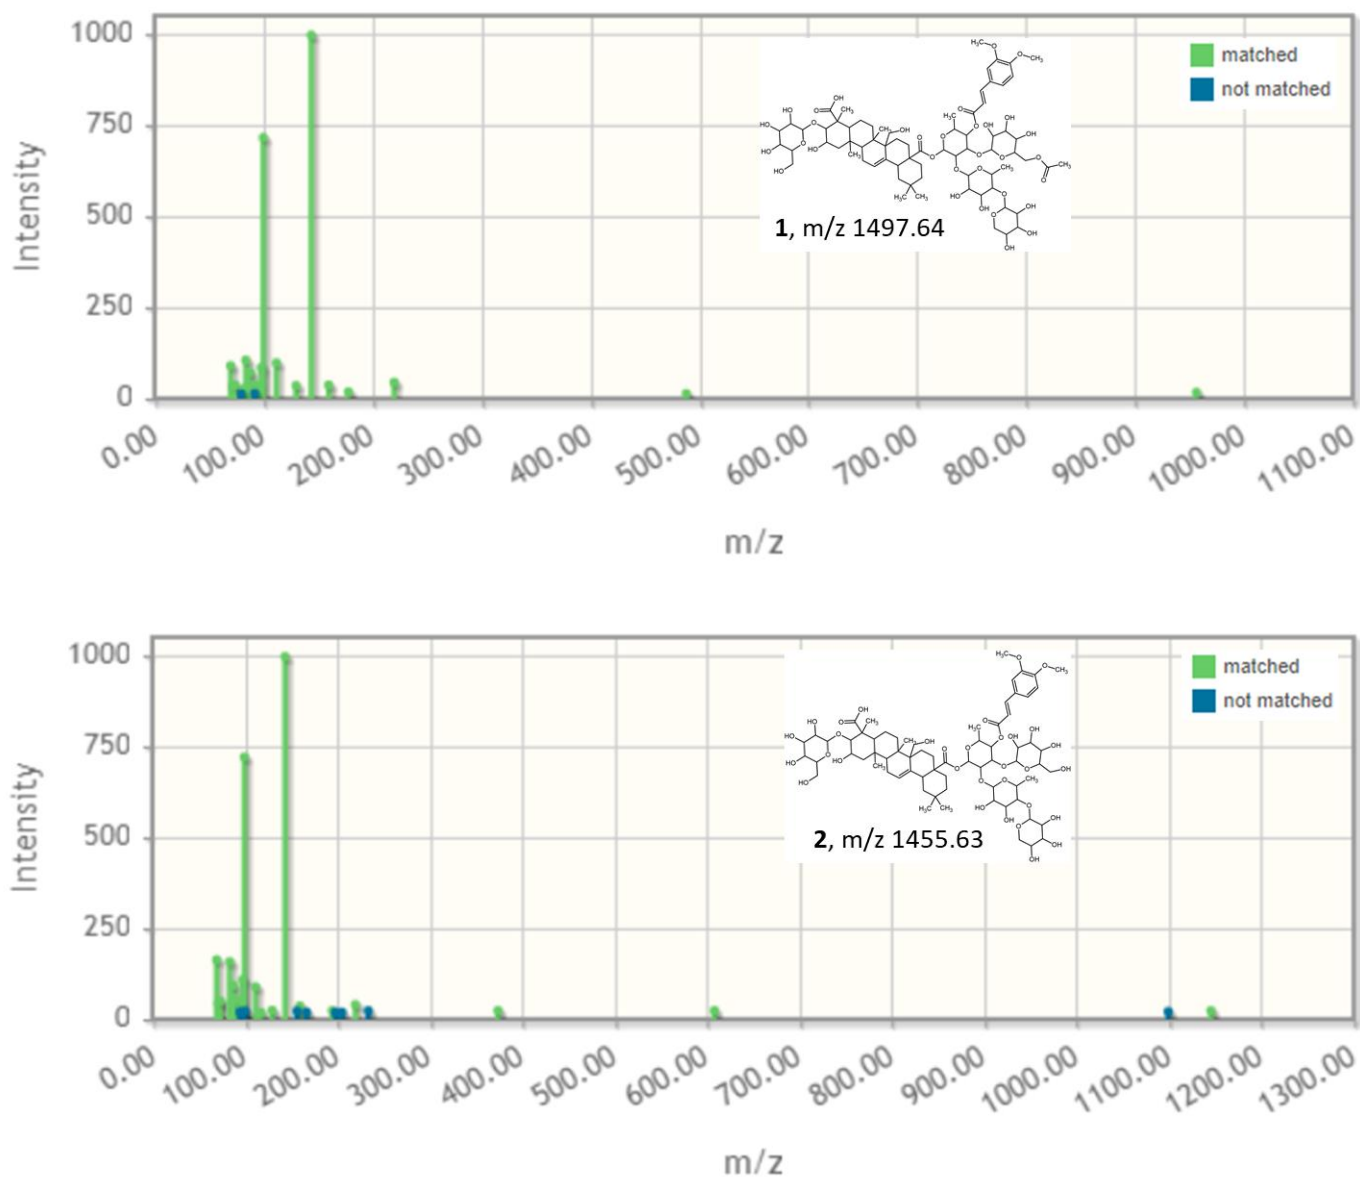

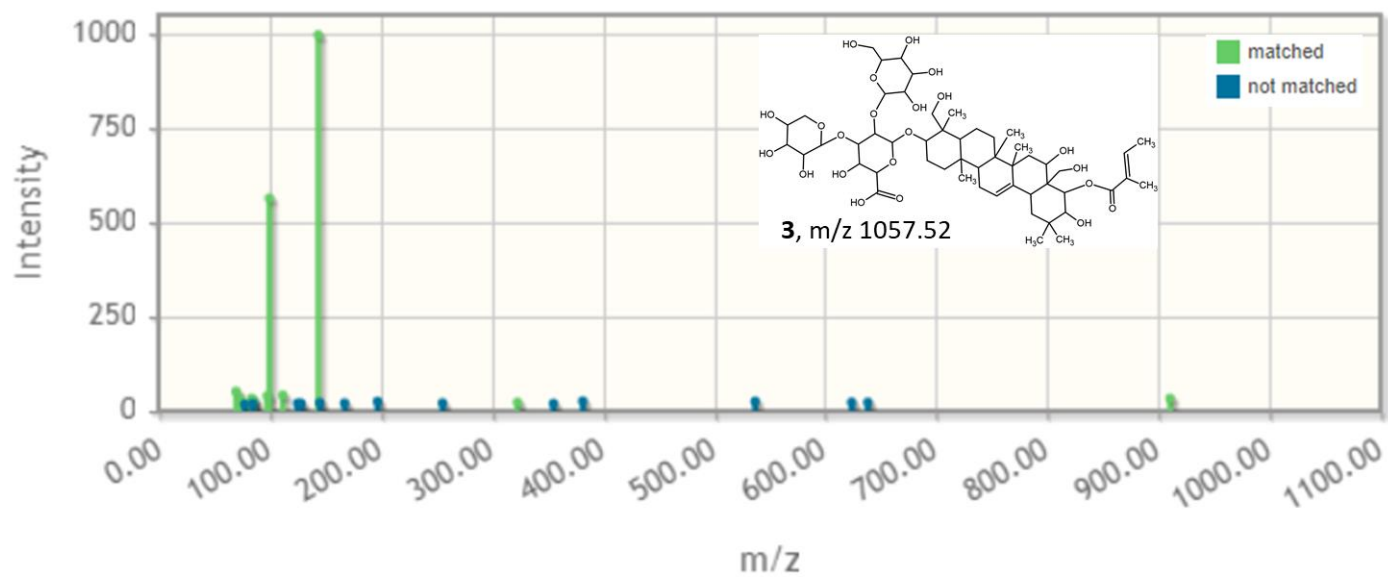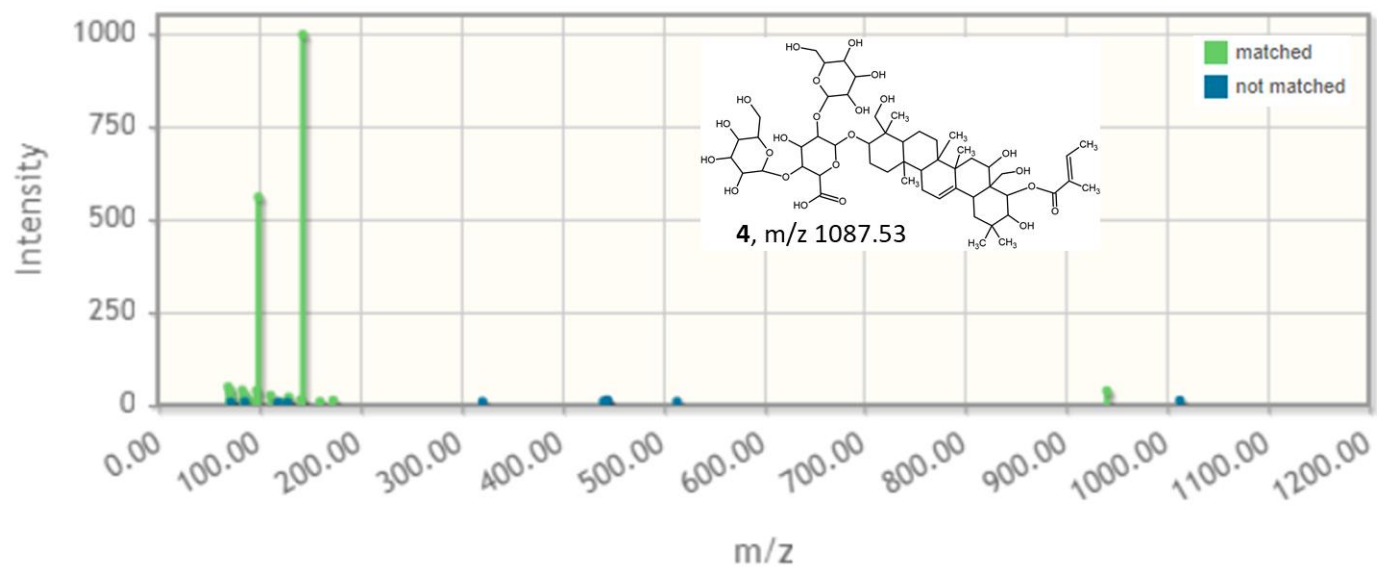

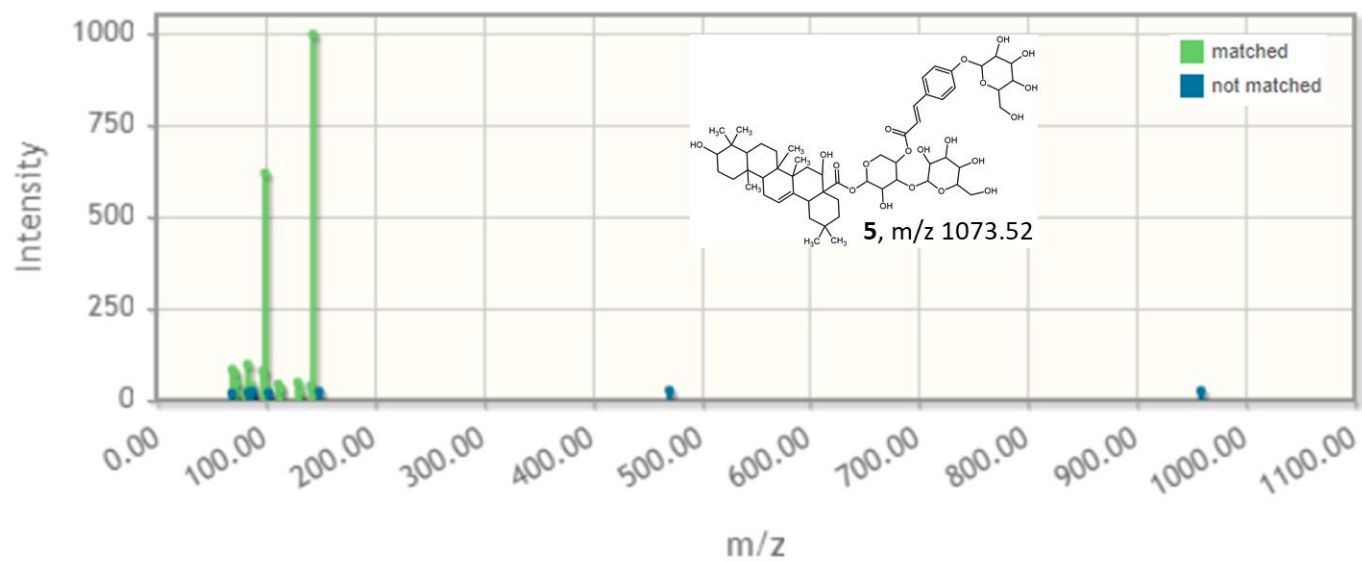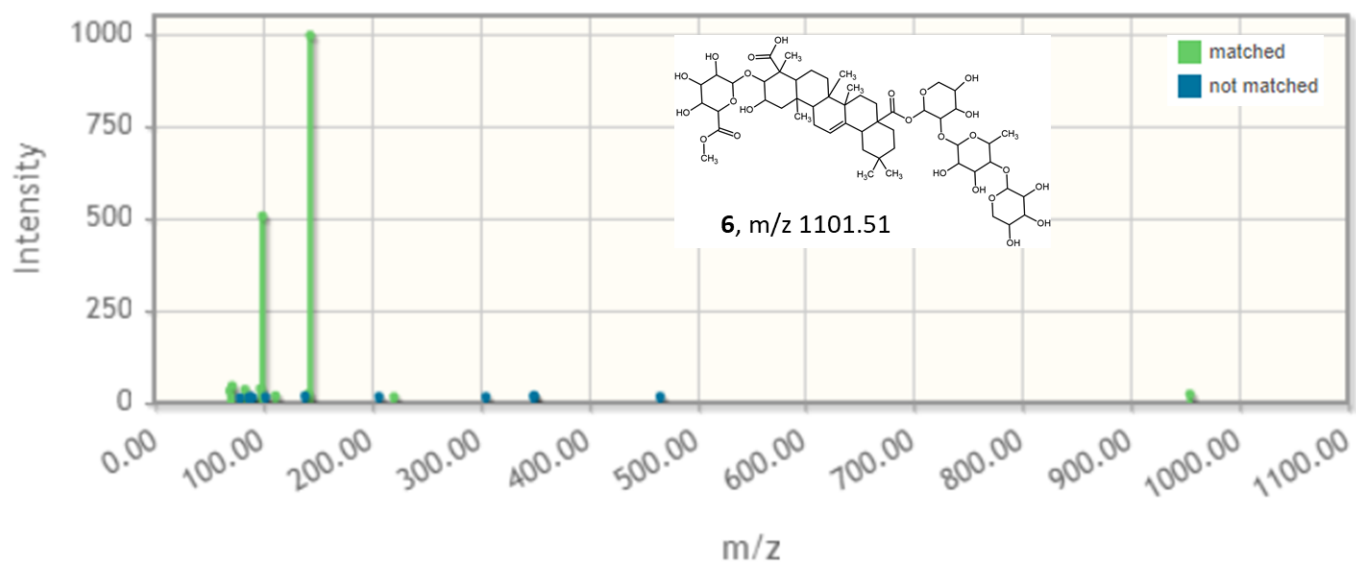

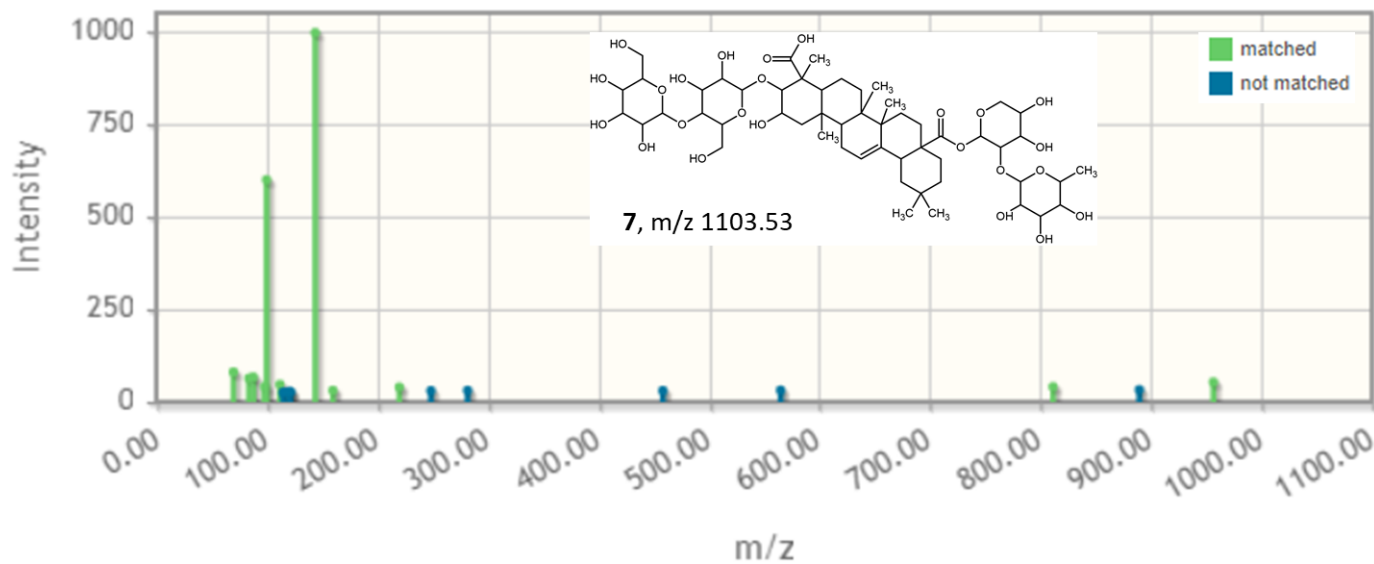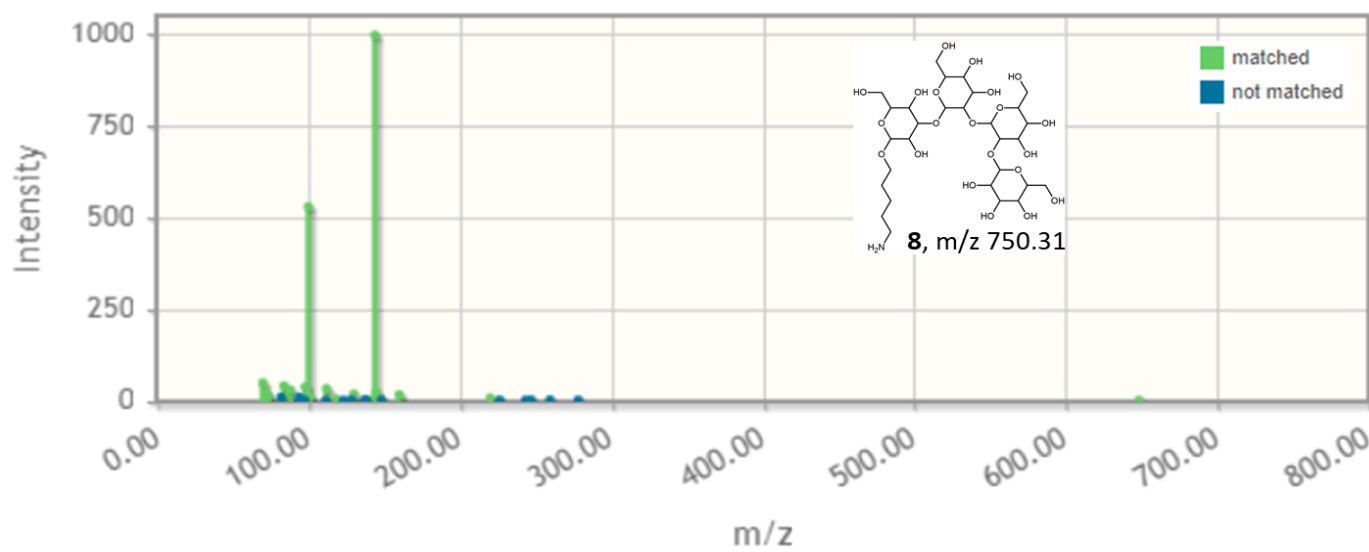

**Figure S2:** Comparison plots showing mass spectrometry fragmentation patterns of putative metabolites (9-13) from the second triterpenoid (hopanoid) molecular network. Peaks shared between predicted and experimental spectra are indicated in green and those not matched are in blue.

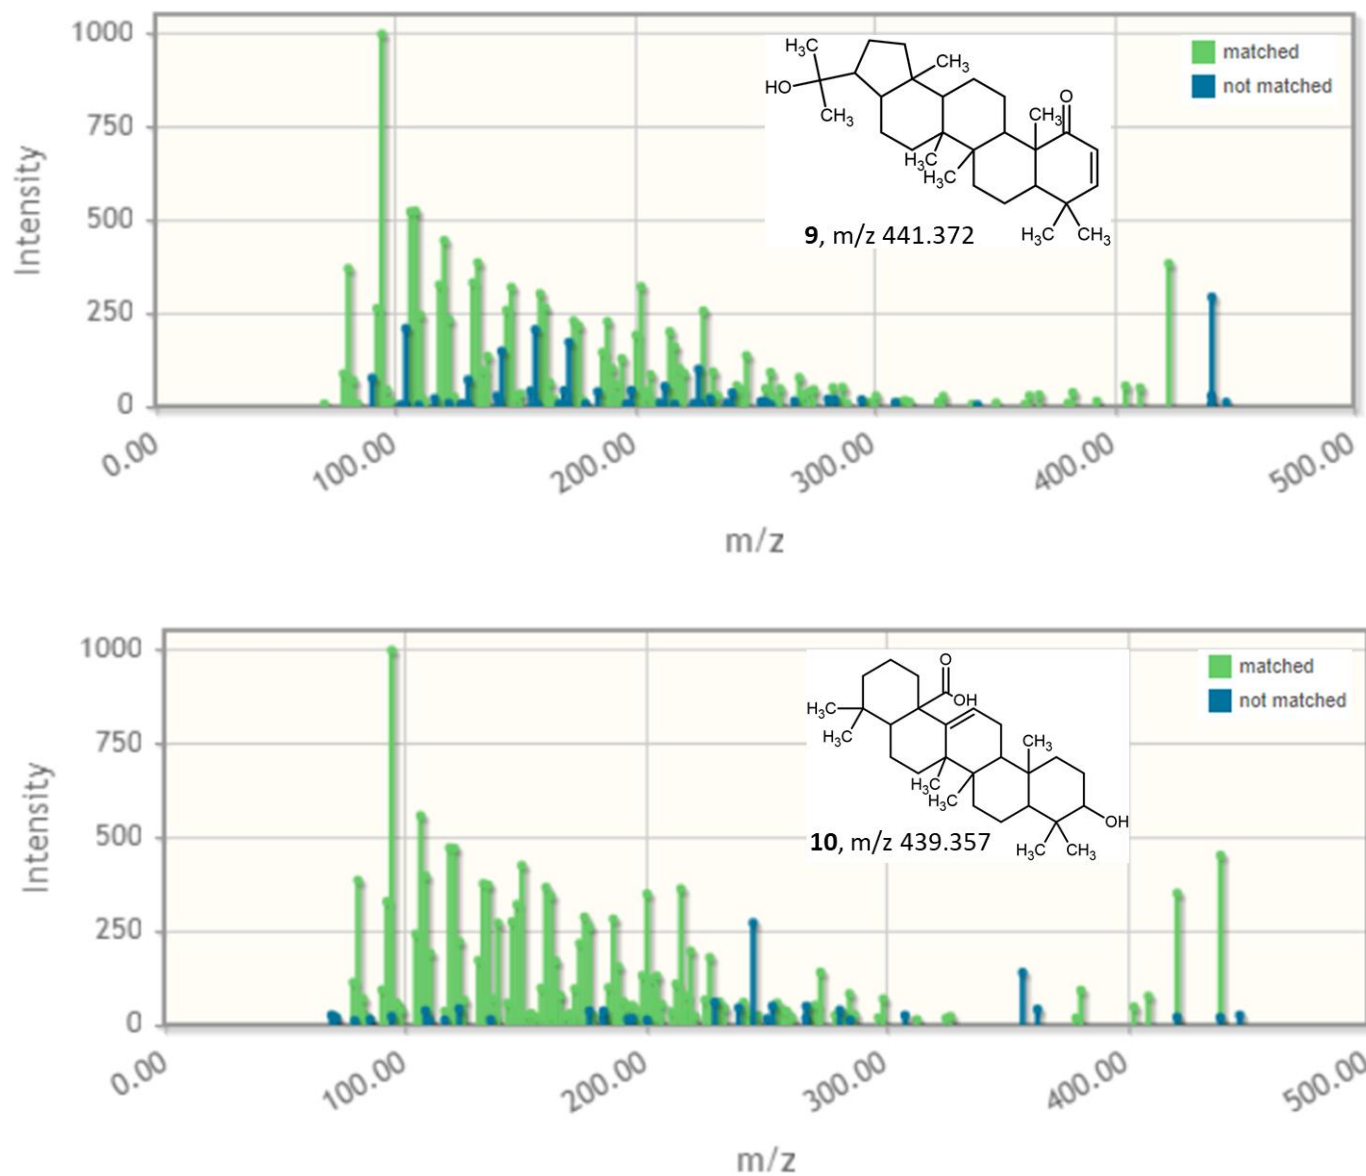

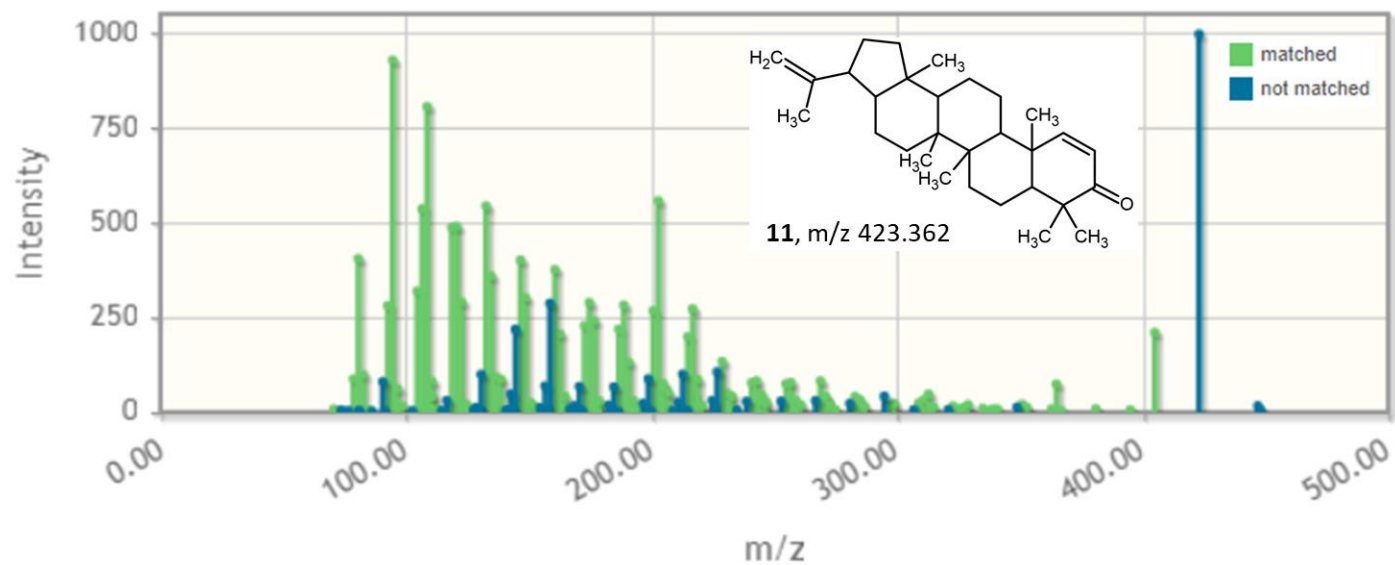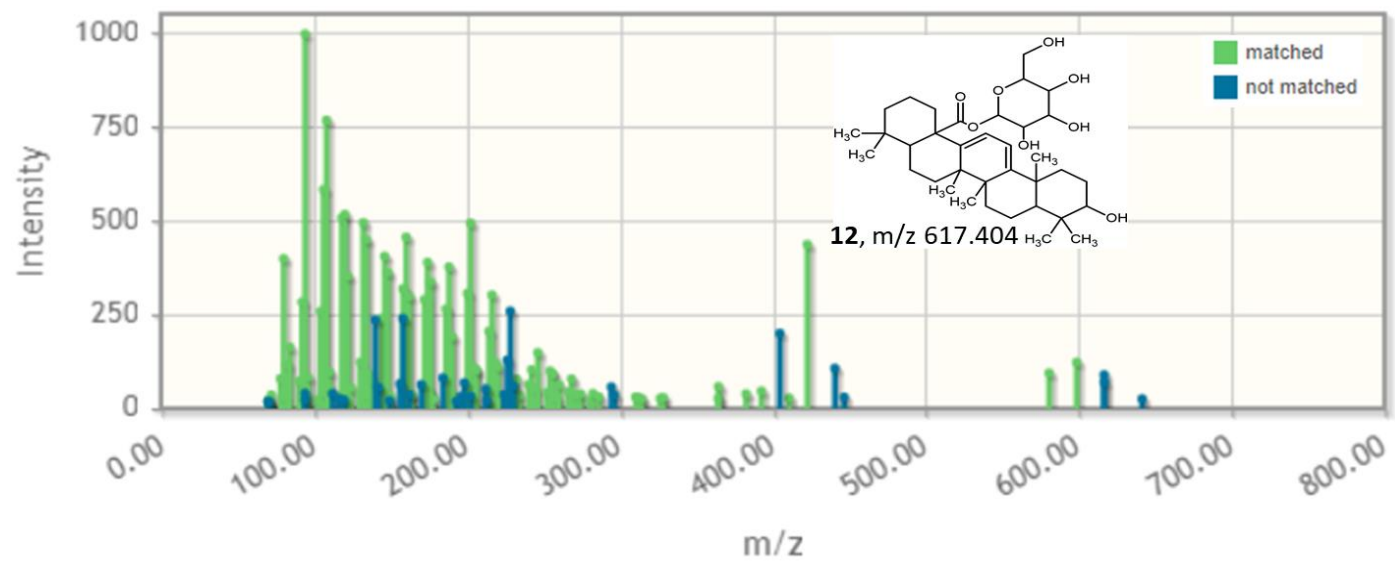

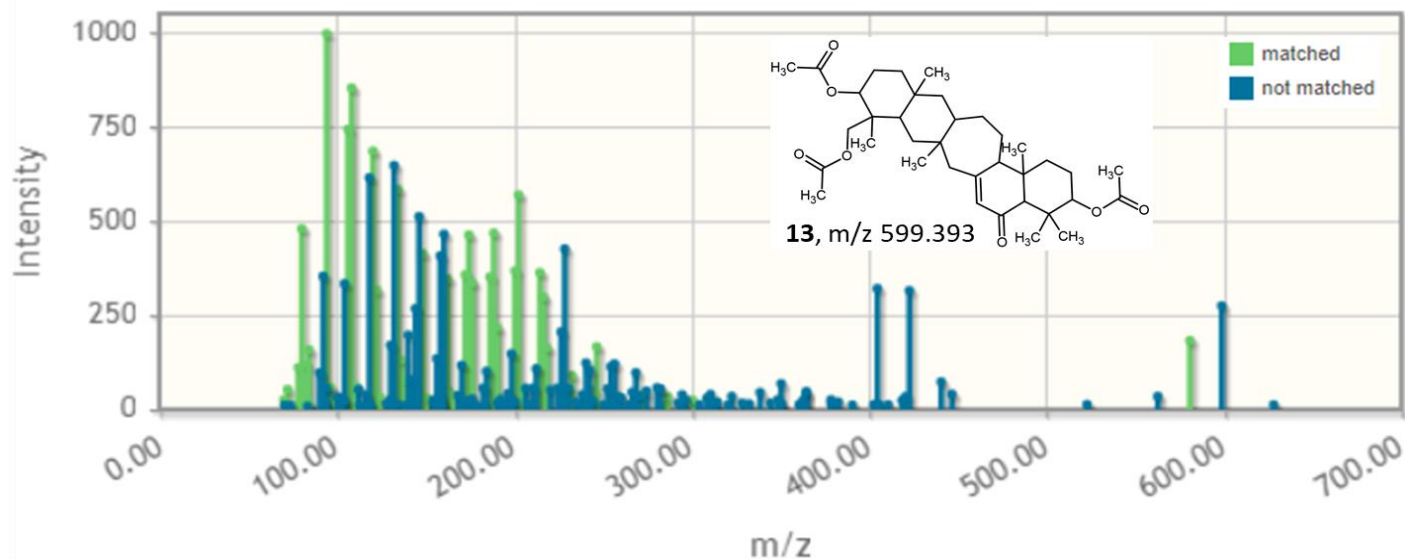

**Figure S3:** Comparison plots showing mass spectrometry fragmentation patterns of putative metabolites (14-16) from the flavonoid molecular network. Peaks shared between predicted and experimental spectra are indicated in green and those not matched are in blue.

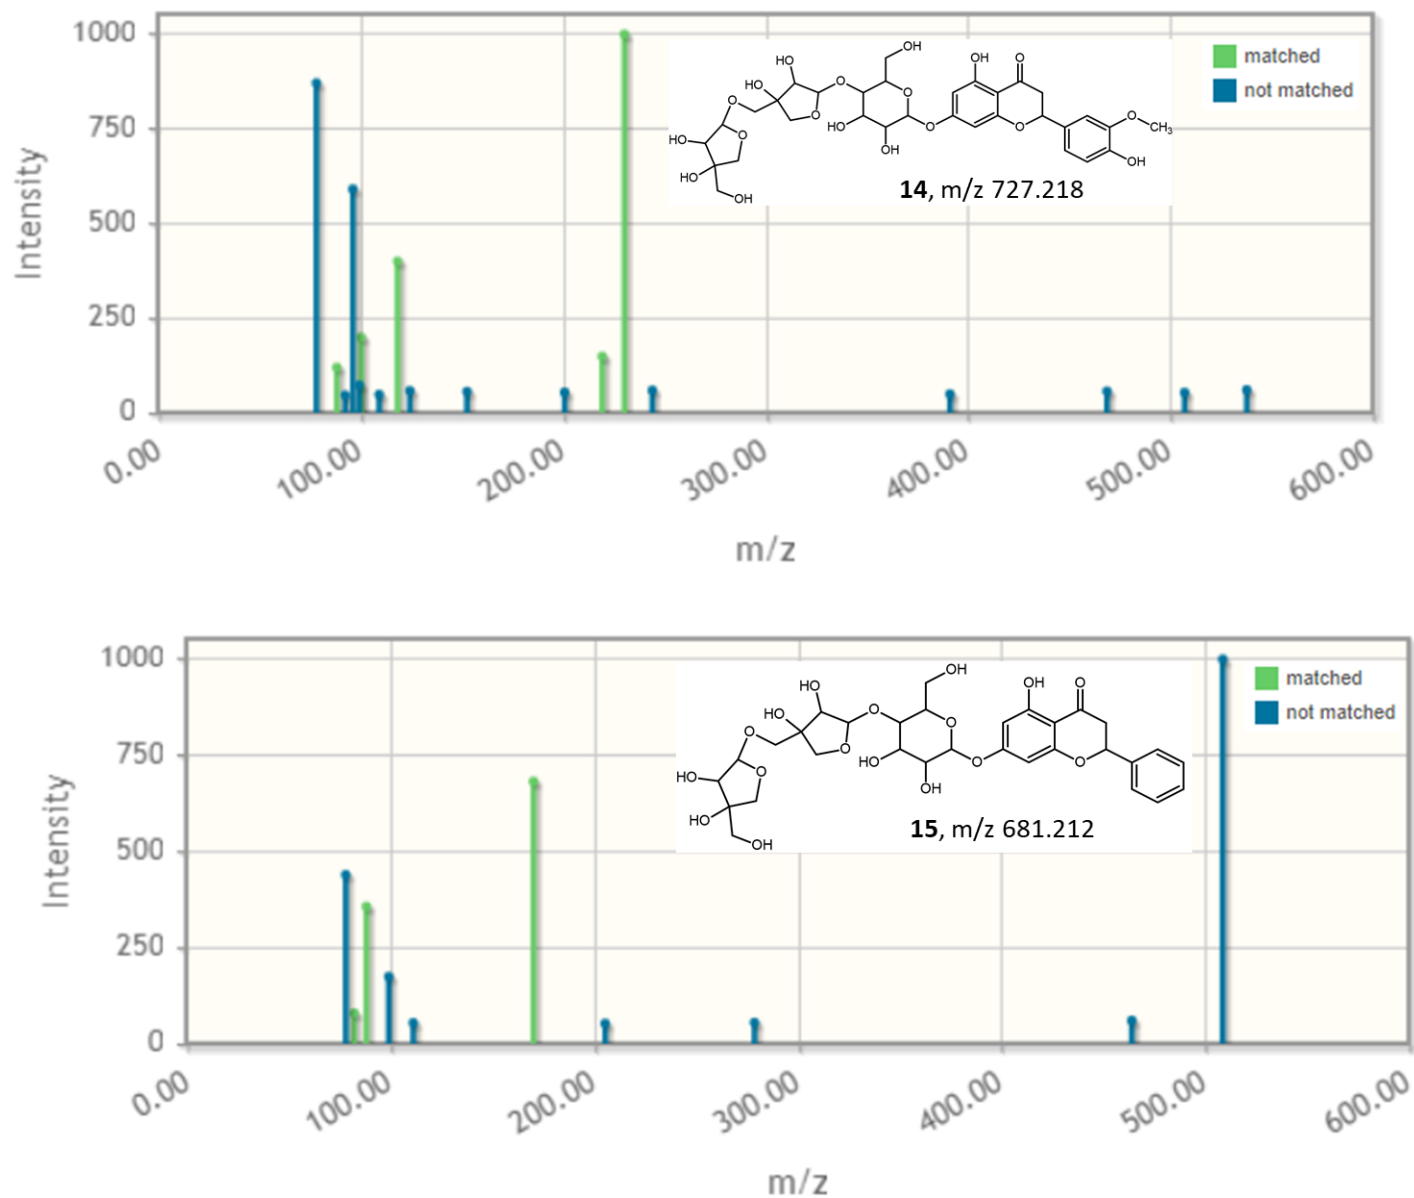



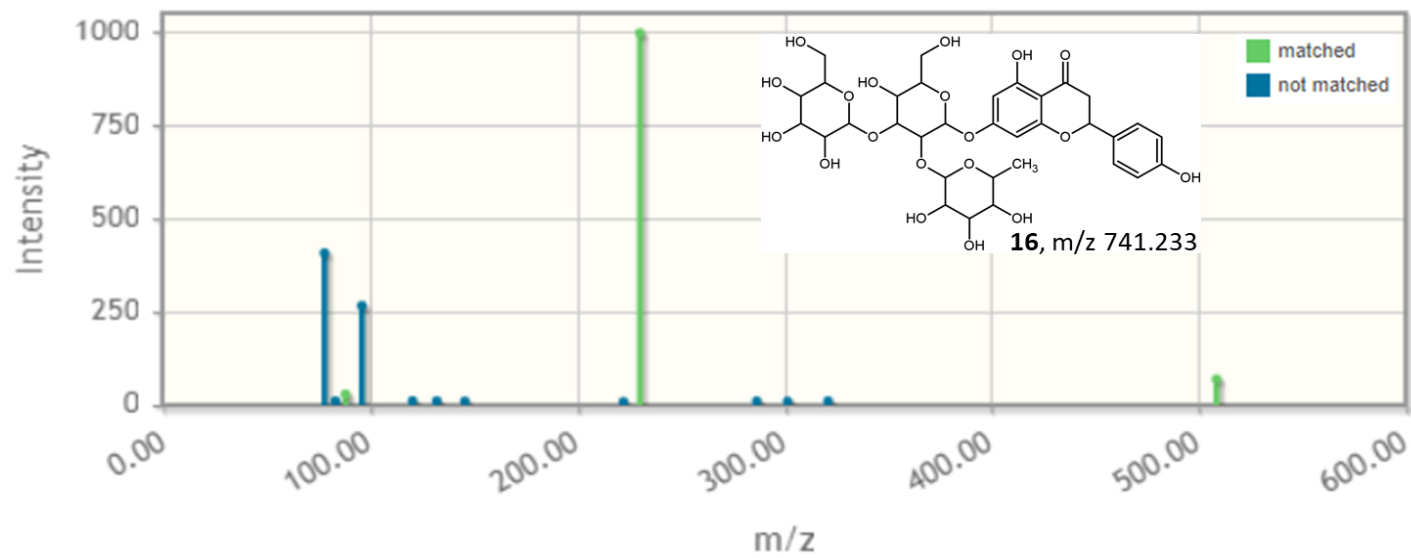

**Figure S4:** Comparison plots showing mass spectrometry fragmentation patterns of putative metabolites (17-18) from the nucleoside antibiotic molecular network. Peaks shared between predicted and experimental spectra are indicated in green and those not matched are in blue.

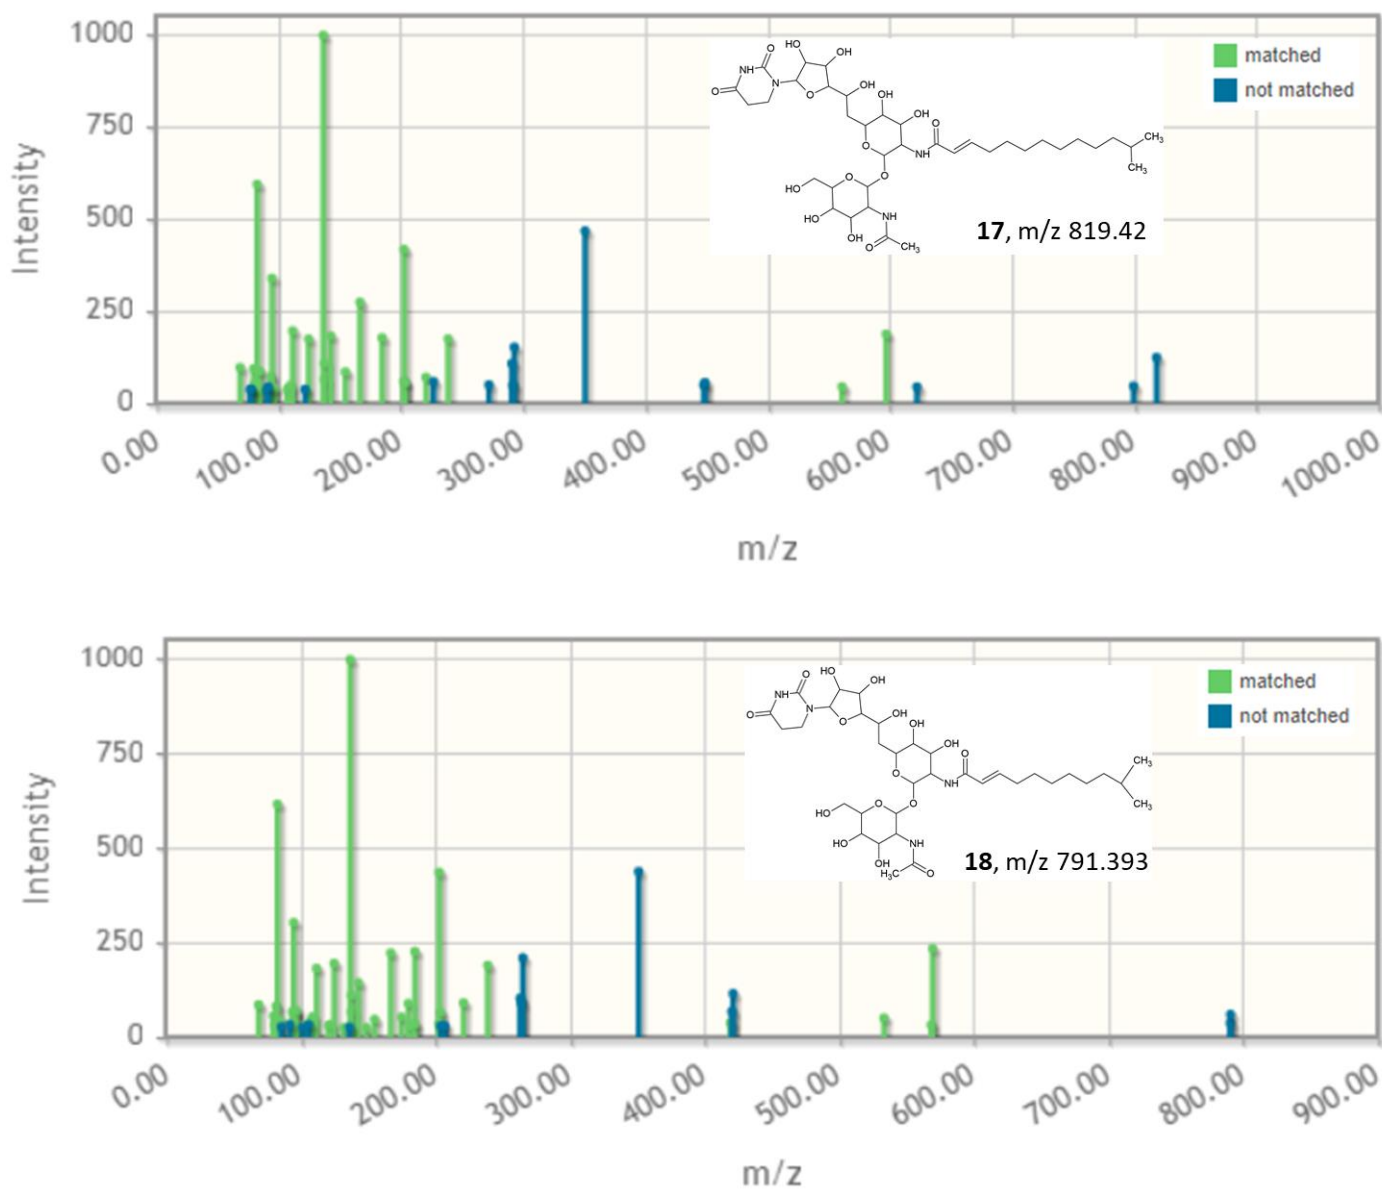

**Figure S5:** Comparison plots showing mass spectrometry fragmentation patterns of putative metabolites (19-21) from the polycyclic tetramate macrolactam molecular network. Peaks shared between predicted and experimental spectra are indicated in green and those not matched are in blue.

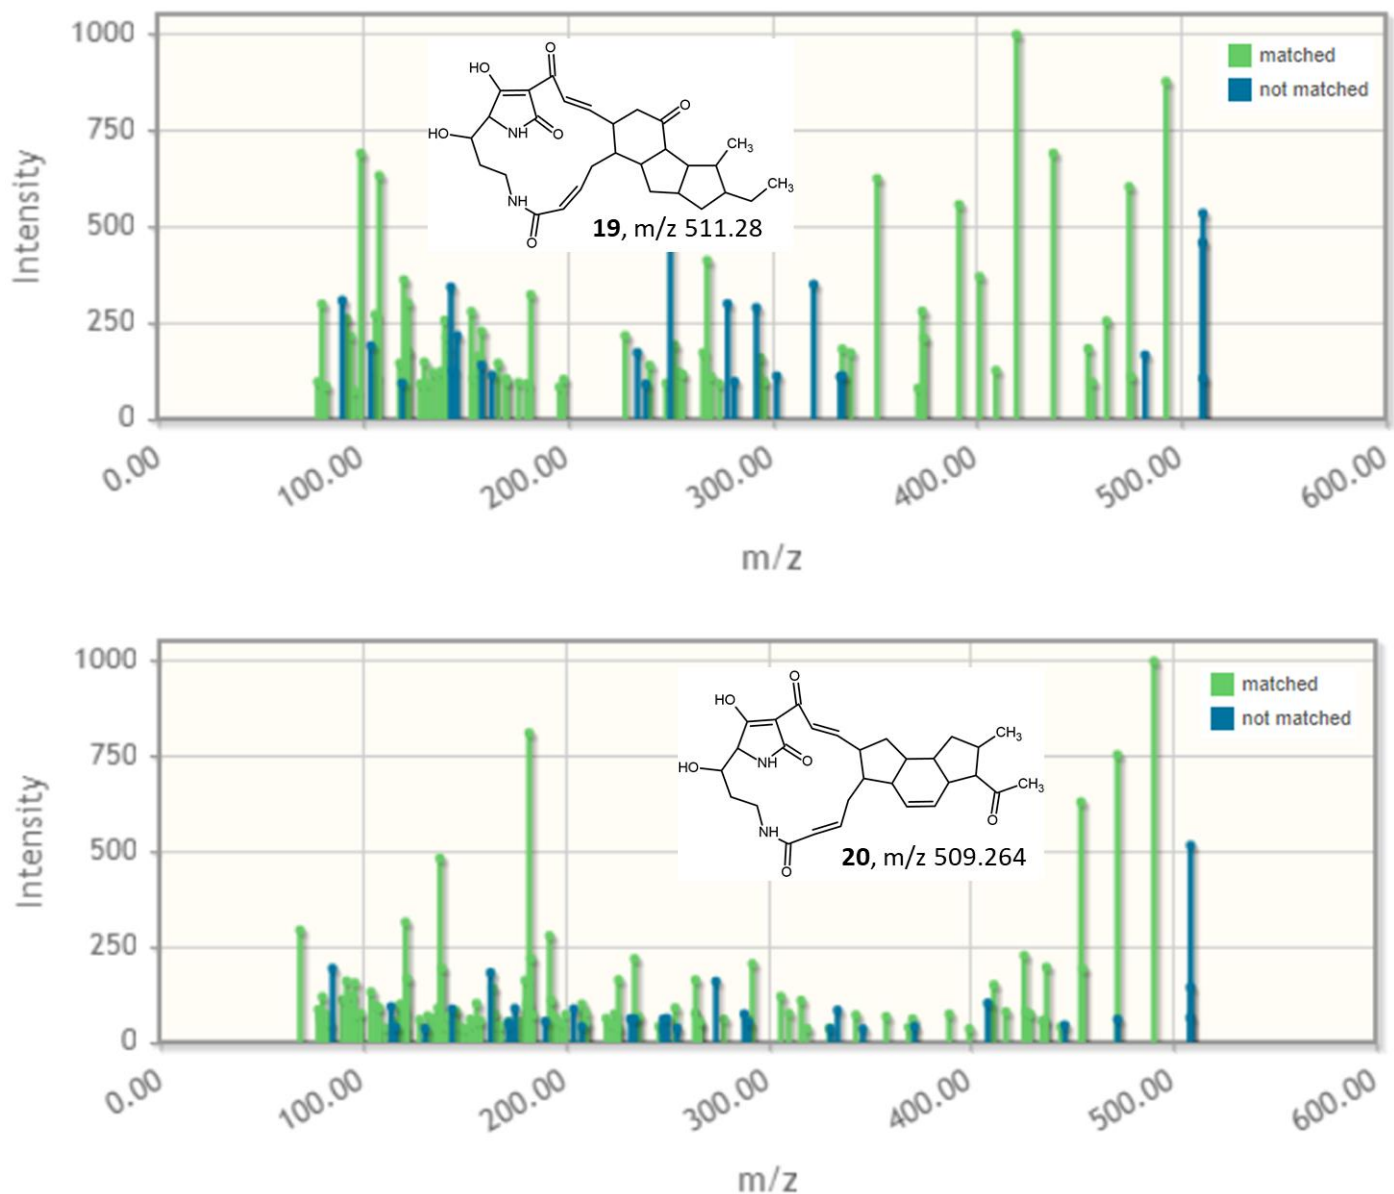

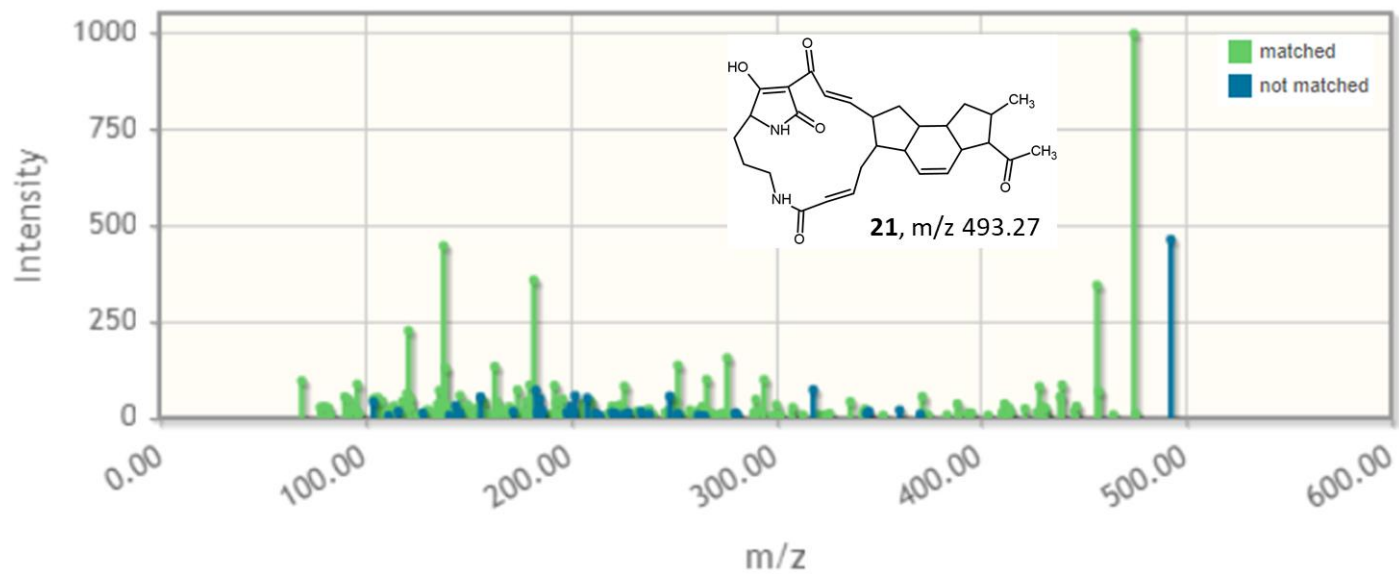

**Figure S6:** Comparison plot showing the predicted and experimental mass spectrometry fragmentation pattern of bafilomycin J (22). Peaks shared between the predicted and experimental spectra are indicated in green and those not matched are in blue.

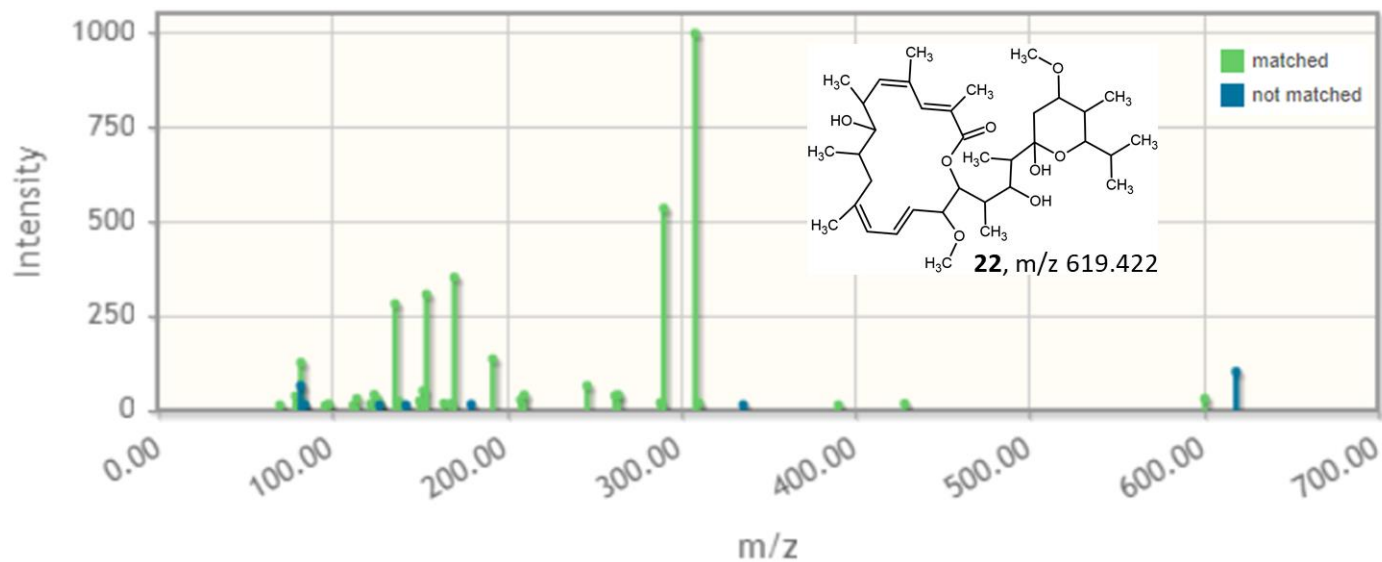

**Figure S7:** Comparison plots showing mass spectrometry fragmentation patterns of putative diterpenoid metabolites (23-25) from the current study. Peaks shared between predicted and experimental spectra are indicated in green and those not matched are in blue.

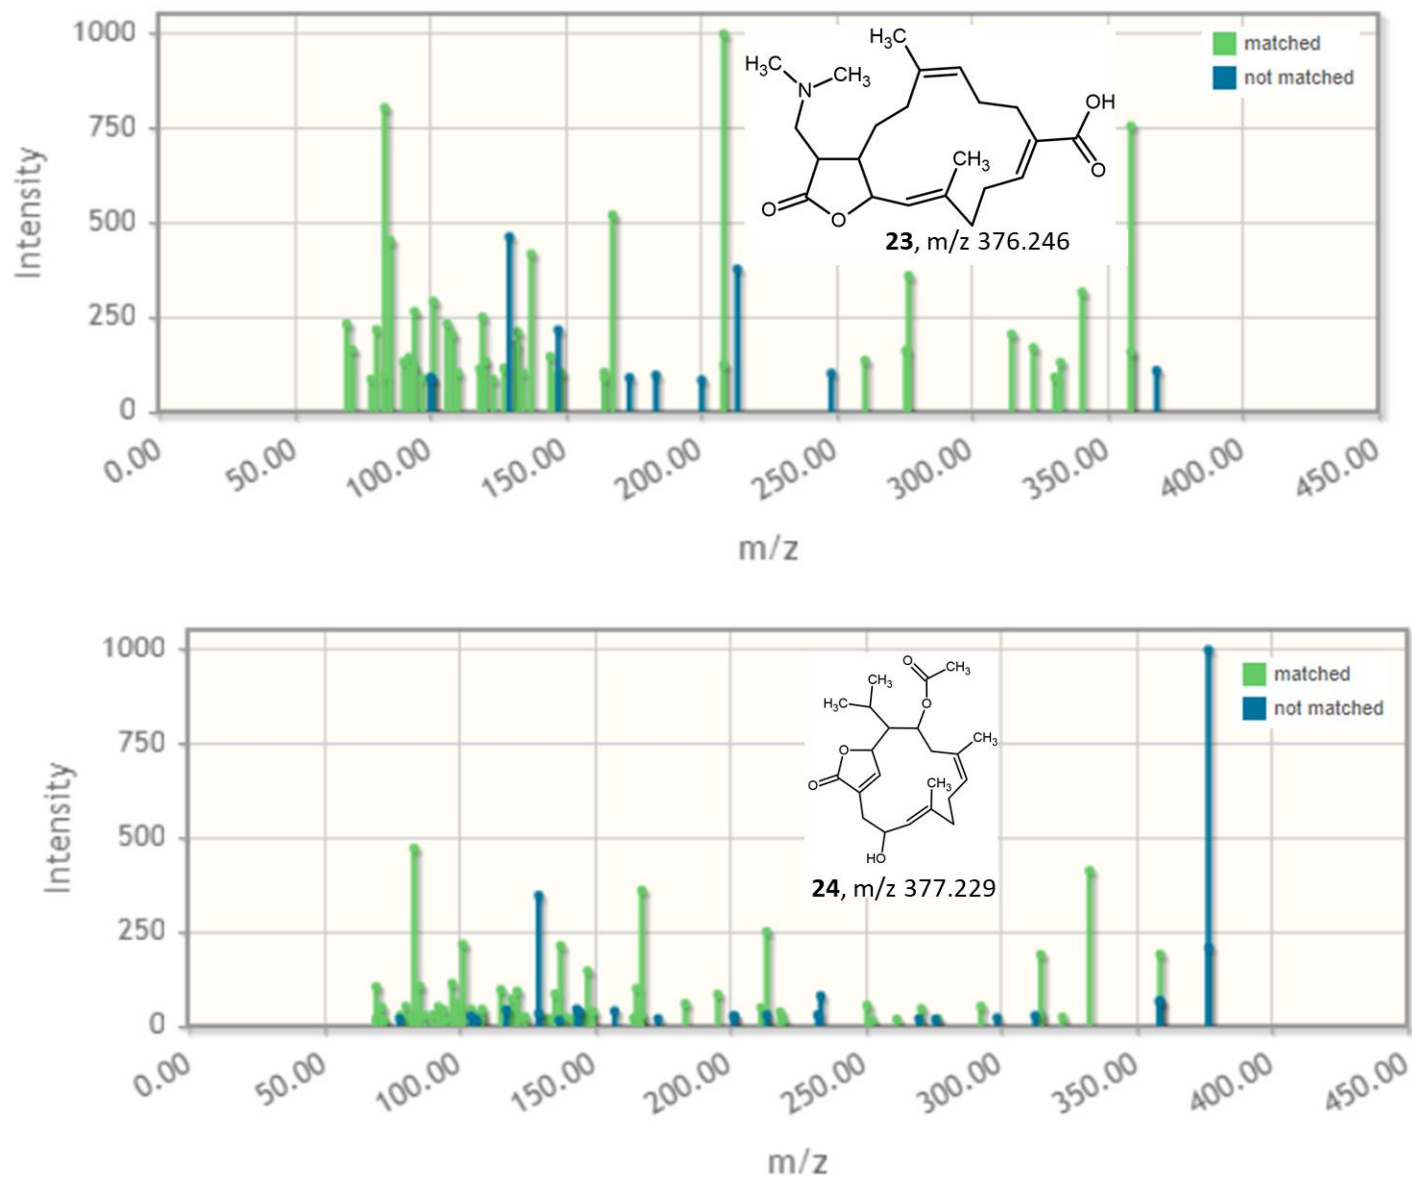

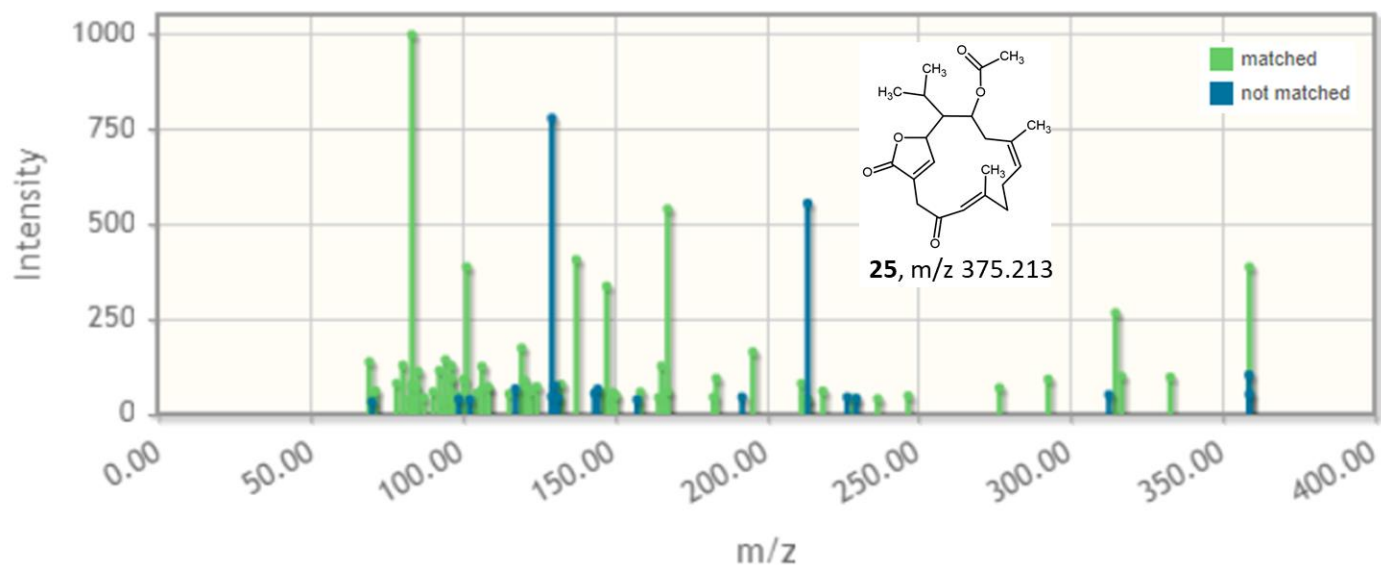

**Figure S8:** Comparison plots showing mass spectrometry fragmentation patterns of putative organonitrogen metabolites (26-28) from the current study. Peaks shared between predicted and experimental spectra are indicated in green and those not matched are in blue.

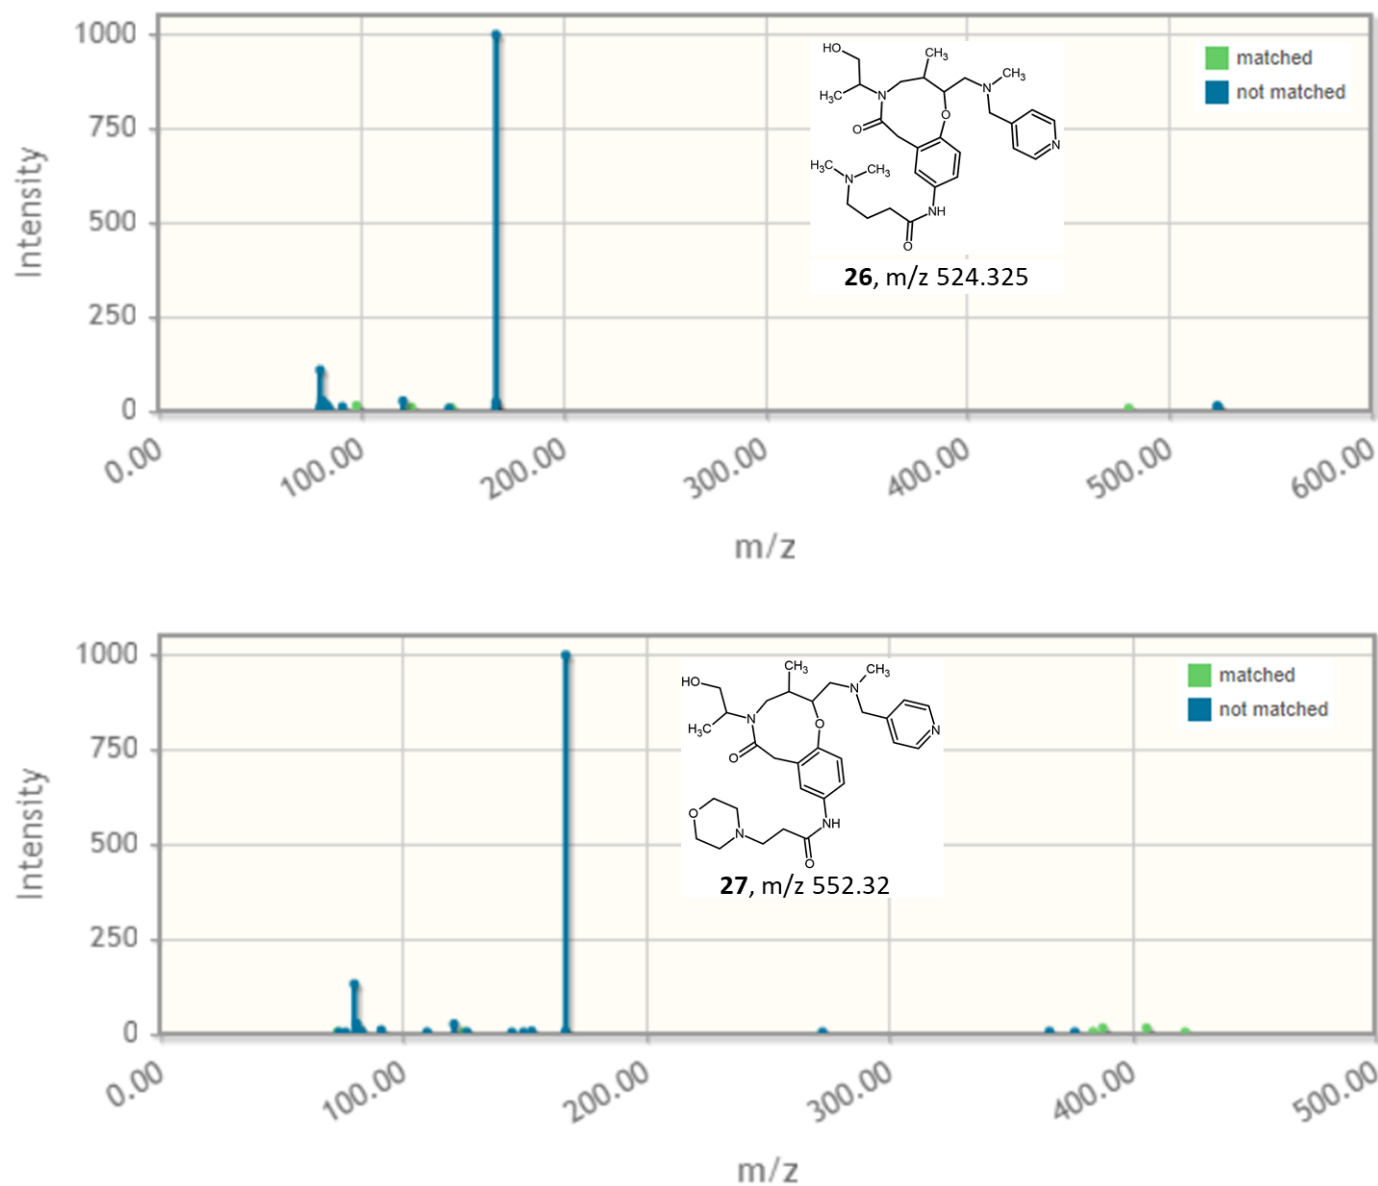



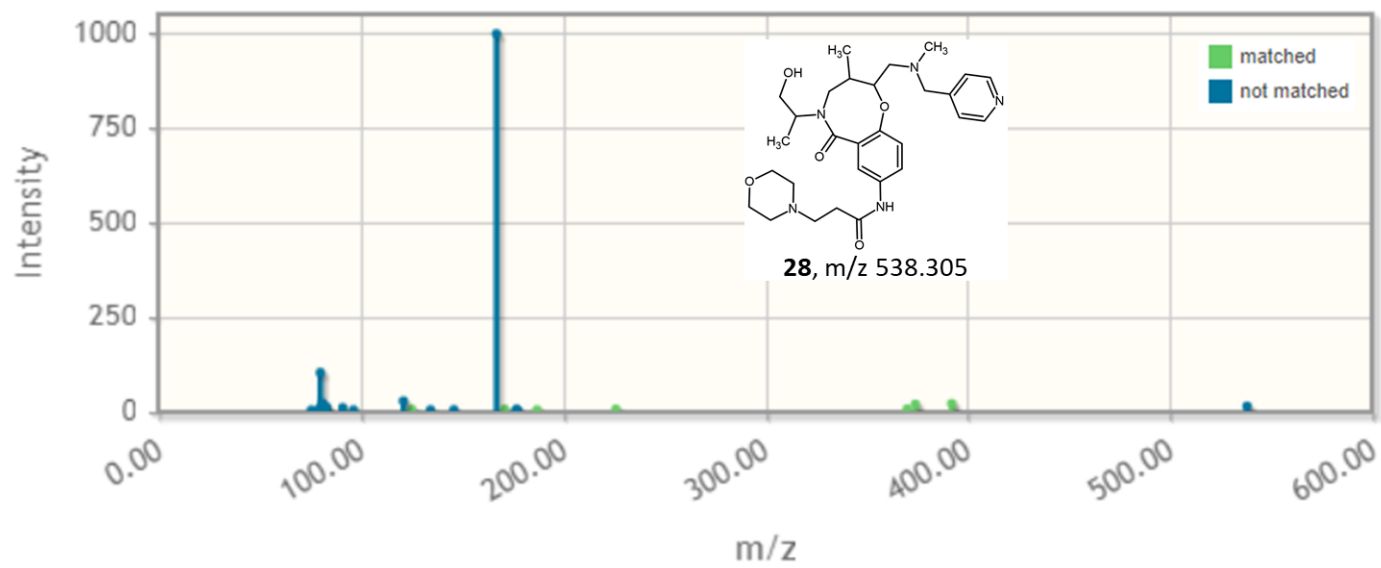

**Figure S9:** The mevalonic acid-based plant triterpene biosynthetic pathway.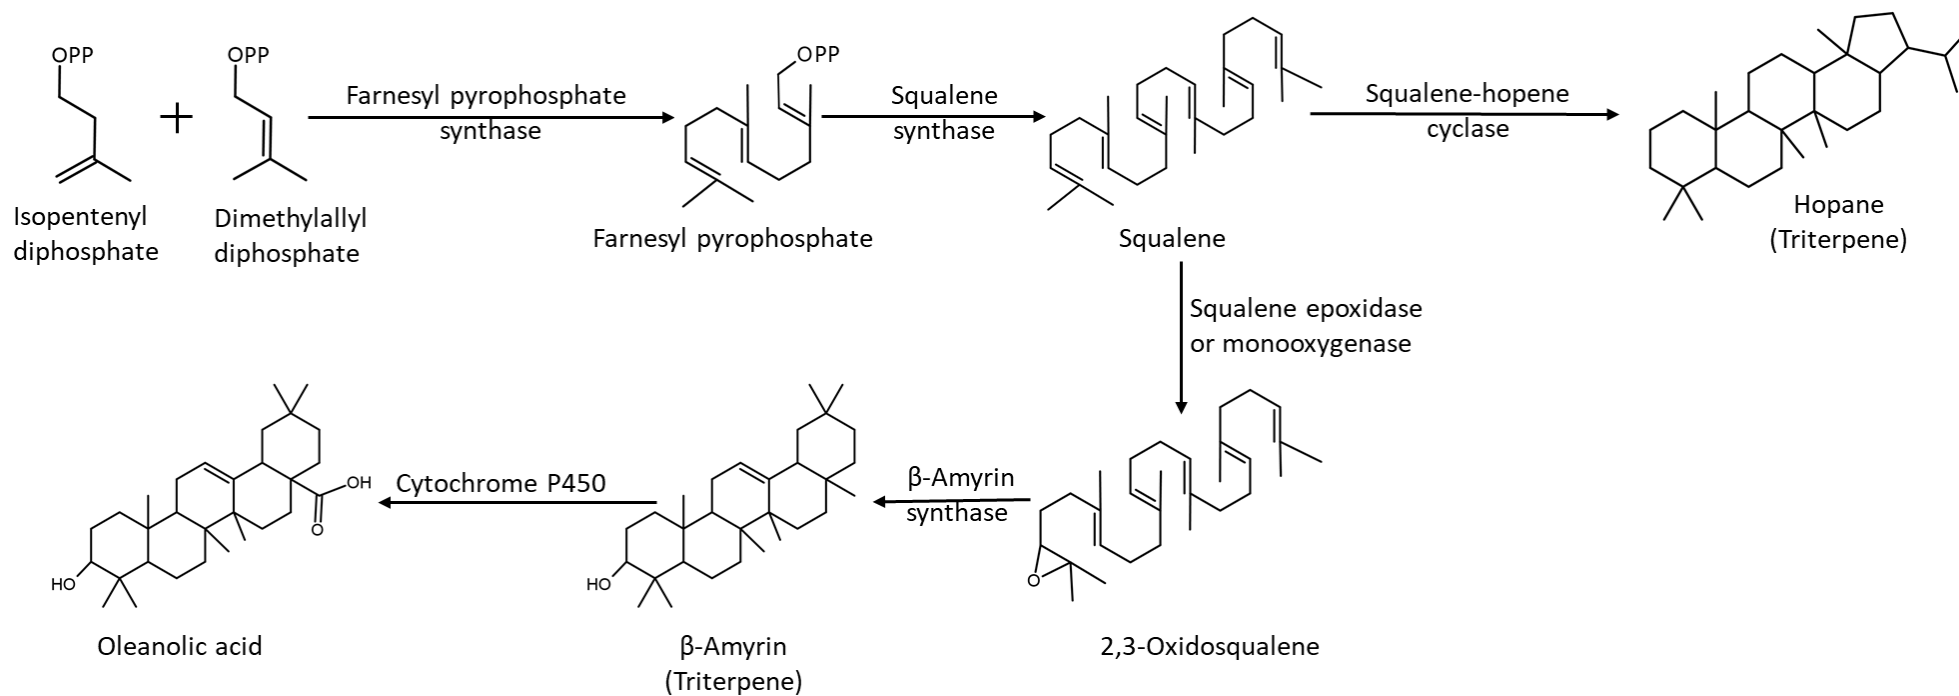

**Figure S10:** The proposed biosynthetic pathway for flavonoids and derived glycosides in *S. clavuligerus*. In the scheme leading to ferulic acid in *S. clavuligerus*, 4-coumarate-3-hydroxylase and caffeic acid *O*-methyltransferase are predicted to be encoded by *ncyP* and *SCLAV\_5485*, respectively (shown in red), as their predicted gene products contain the required protein domains. In the current study, caffeic acid (shown in red) was also detected by GNPS in some of the *S. clavuligerus* overexpression strains (including *rpsL*-K88E).

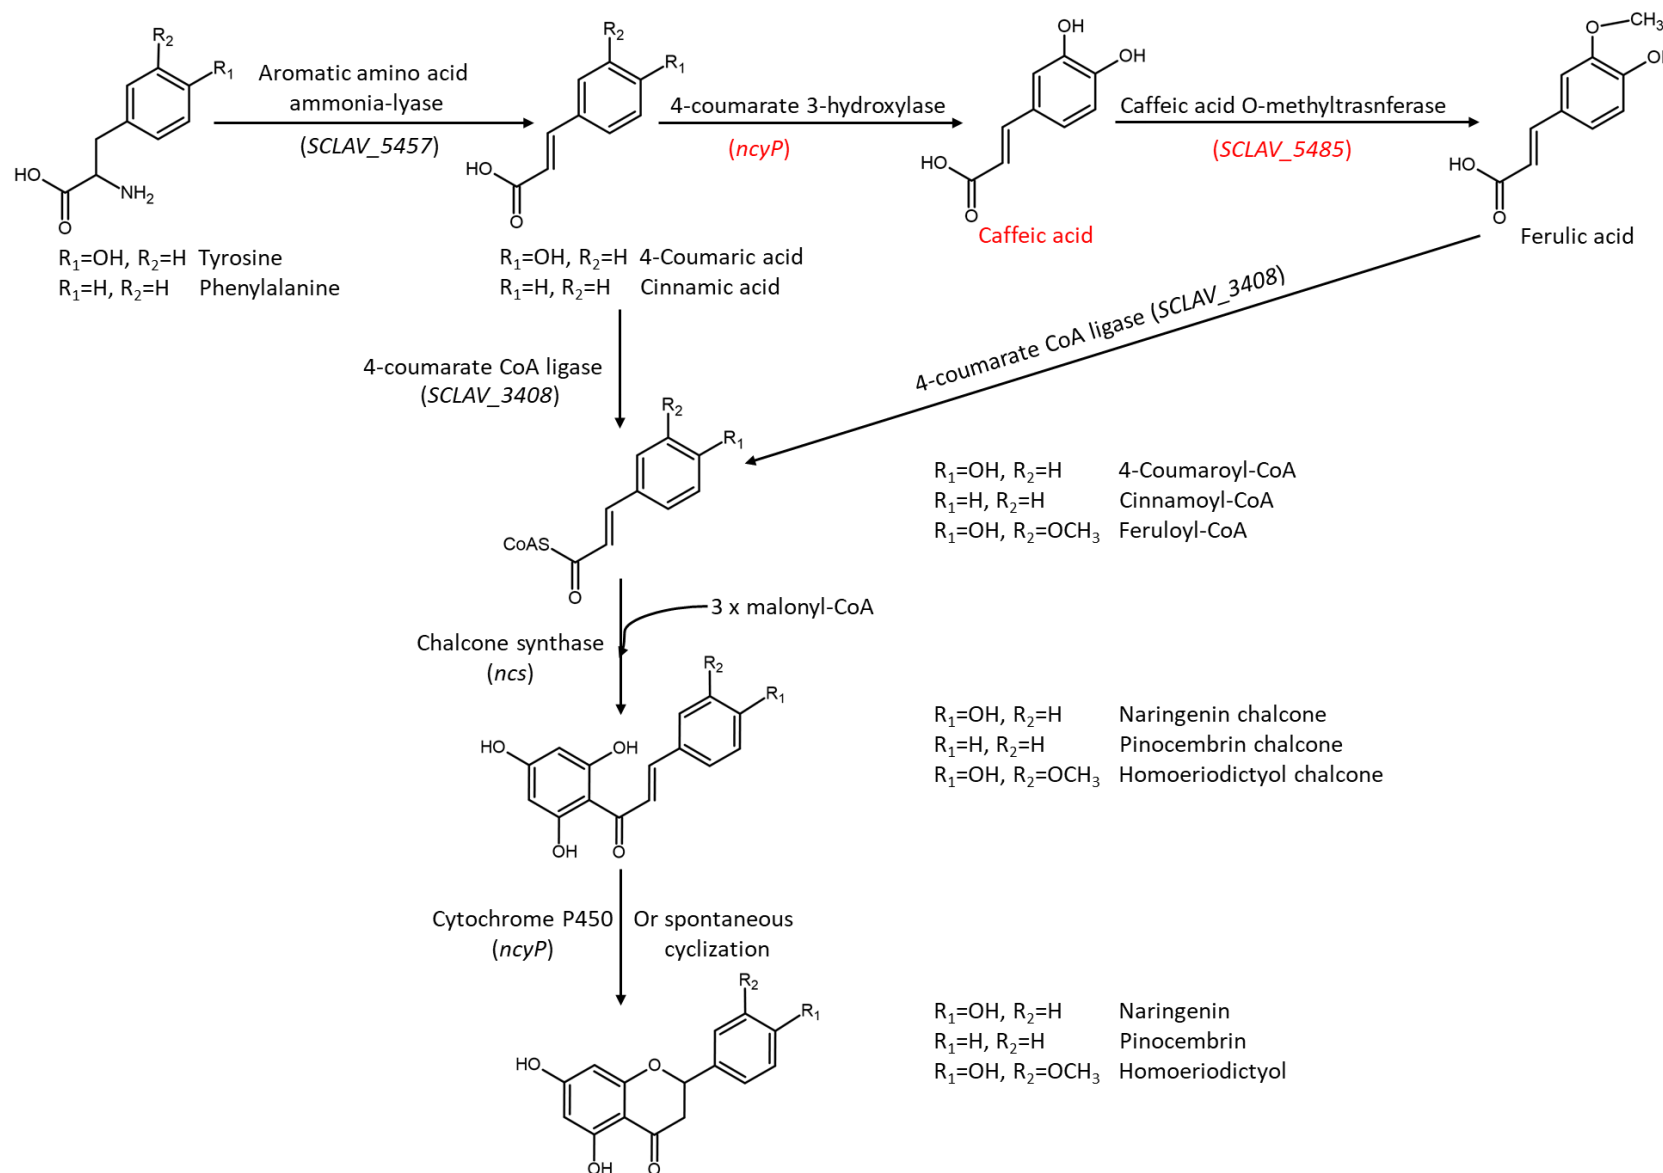

**Figure S11:** The proposed biosynthetic scheme for clifednamide A and B from ikarugamycin in *S. clavuligerus*.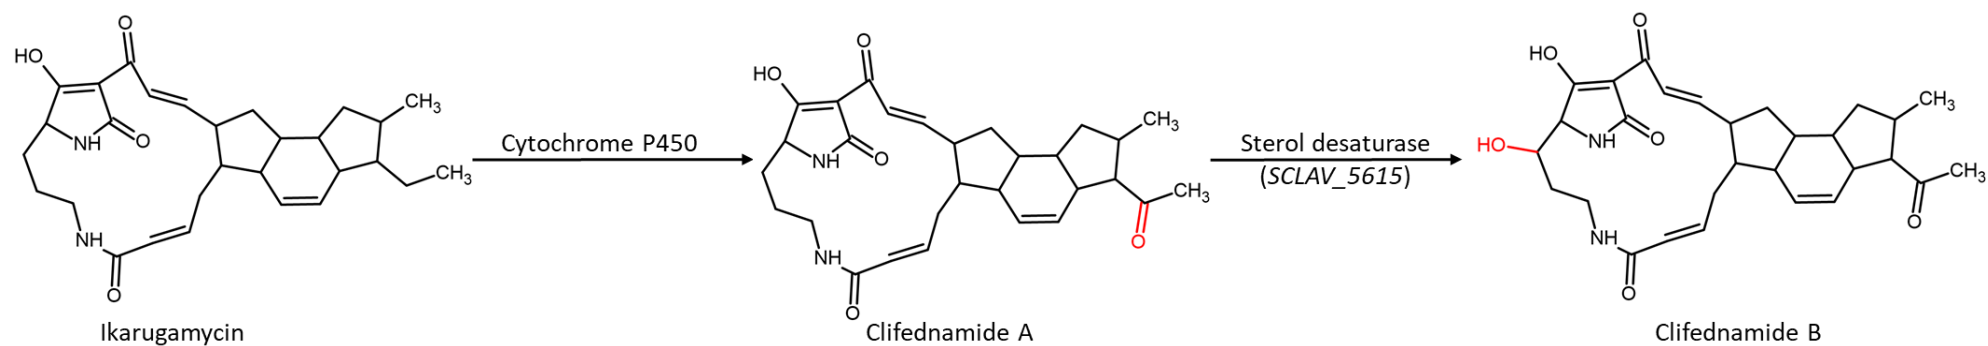

**Figure S12:** The proposed biosynthetic scheme for bafilomycin J involving putative products from a partial gene cluster present in *S. clavuligerus*.

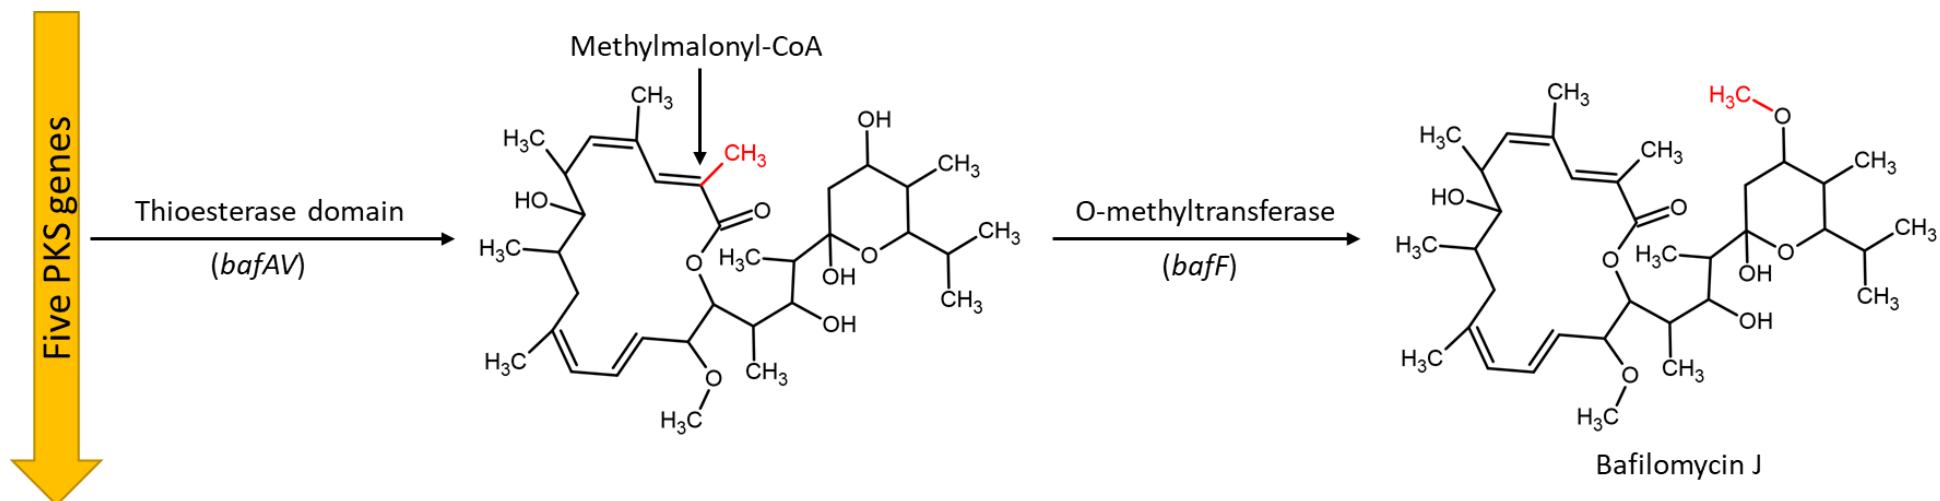

**Table S1:** Global natural products social molecular networking (GNPS) and network annotation propagation (NAP) parameters used for analysis in the current study.

| GNPS parameters                  |              | NAP parameters                                       |                                            |
|----------------------------------|--------------|------------------------------------------------------|--------------------------------------------|
| Precursor ion mass tolerance     | 0.02 Da      | Number of cluster index                              | 0                                          |
| Fragment ion mass tolerance      | 0.02 Da      | Cosine value to sub-select                           | 0.5                                        |
| Minimum cosine value             | 0.6          | Candidates for consensus score                       | 10                                         |
| Minimum matched fragment ions    | 3            | Accuracy of exact mass candidate search              | 15 ppm                                     |
| Network TopK                     | 10           | Acquisition mode                                     | Positive or negative                       |
| Minimum cluster size             | 1            | Adducts (positive)                                   | [M+H], [M+Na], [M+NH <sub>4</sub> ], [M+K] |
| Run MScluster                    | Yes          | Adducts (negative)                                   | [M-H]                                      |
| Maximum connected component size | 100          | Multiple structural databases used*                  | GNPS, HMDB, SUPNAT, ChEBI, DRUGBANK, FooDB |
| Filter precursor window          | Filter       | Skip parent mass selection                           | No                                         |
| Filter library                   | Filter       | Maximum number of candidates structures in the graph | 10                                         |
| Filter peaks in 50Da window      | Don't filter | Workflow type                                        | Standard                                   |

\* GNPS: Global Natural Products Social molecular networking (<https://gnps.ucsd.edu/ProteoSAFe/static/gnps-splash.jsp>)

HMDB: Human Metabolome Database (<https://hmdb.ca/>)

SUPNAT: SuperNatural II database ([http://bioinf-applied.charite.de/supernatural\\_new/](http://bioinf-applied.charite.de/supernatural_new/))

ChEBI: Chemical Entities of Biological Interest (<https://www.ebi.ac.uk/chebi/>)

DRUGBANK: <https://go.drugbank.com/>

FooDB: Food Database (<https://www.foodb.ca/>)
